# Supplementary material
Source: Royal Society of Chemistry journal article supplement (doi:10.1039/d6ta01398h)
Supplement: d6ta01398h1.pdf [file d6ta01398h1.pdf]

## Supplementary Information

### Mitigating Ni Migration in Solid Oxide Electrolysis by Altering Ni-YSZ Electrode Composition

Pattiya Pibulchinda<sup>a</sup>, Hugo Duchêne<sup>b</sup>, Bartłomiej Winiarski<sup>c</sup>, Maxime Hubert<sup>b</sup>,  
Peter Voorhees<sup>a</sup>, Katsuyo Thornton<sup>d</sup>, Jérôme Laurencin<sup>b</sup>, Scott A Barnett<sup>a\*</sup>

<sup>a</sup>Department of Materials Science and Engineering, Northwestern University, Evanston, Illinois, 60208, United States

<sup>b</sup>University Grenoble Alpes, CEA, LITEN, DTCH 17 rue des Martyrs, 38054 Grenoble, France

<sup>c</sup>ThermoFisher Scientific, Vlastimila Pecha 1282/12, Brno 627 00, Czech Republic

<sup>d</sup>Department of Materials Science and Engineering, University of Michigan, Ann Arbor, Michigan 48109, United States

\*Correspondence to [s-barnett@northwestern.edu](mailto:s-barnett@northwestern.edu)

#### Table of Contents

This PDF file includes:

- Supplementary Text (Page 2)
- Supplementary Figures 1-8 (Page 3-7)
- Supplementary Table 1-2 (Page 8)

## Supplementary Text

Note that the SOFC electrodes sometimes delaminated along the electrode-electrolyte interface during or after the life tests under these conditions, especially for more extreme conditions – lower electrode porosity or higher current density. This is attributed to an increase in  $H_2O/H_2$  ratio above the inlet 85%/15% value due to gas diffusion limitations, reaching a maximum at the SOFC electrode-electrolyte interface where Ni oxidation, and hence delamination, occurs.

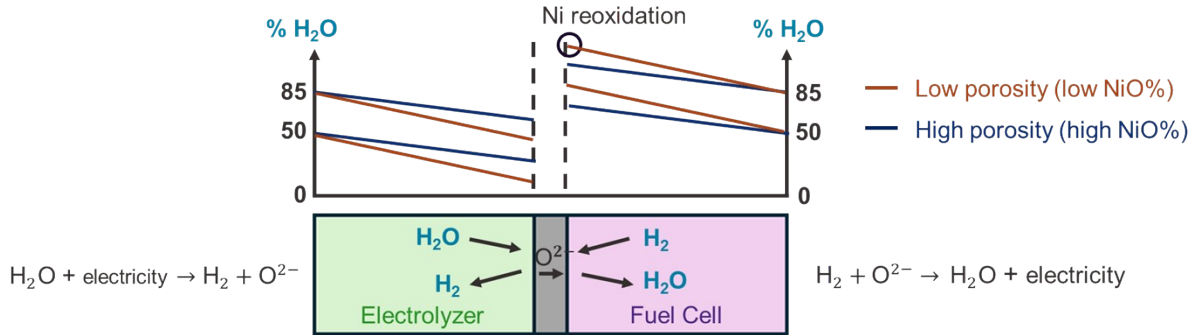

## Supplementary Figures

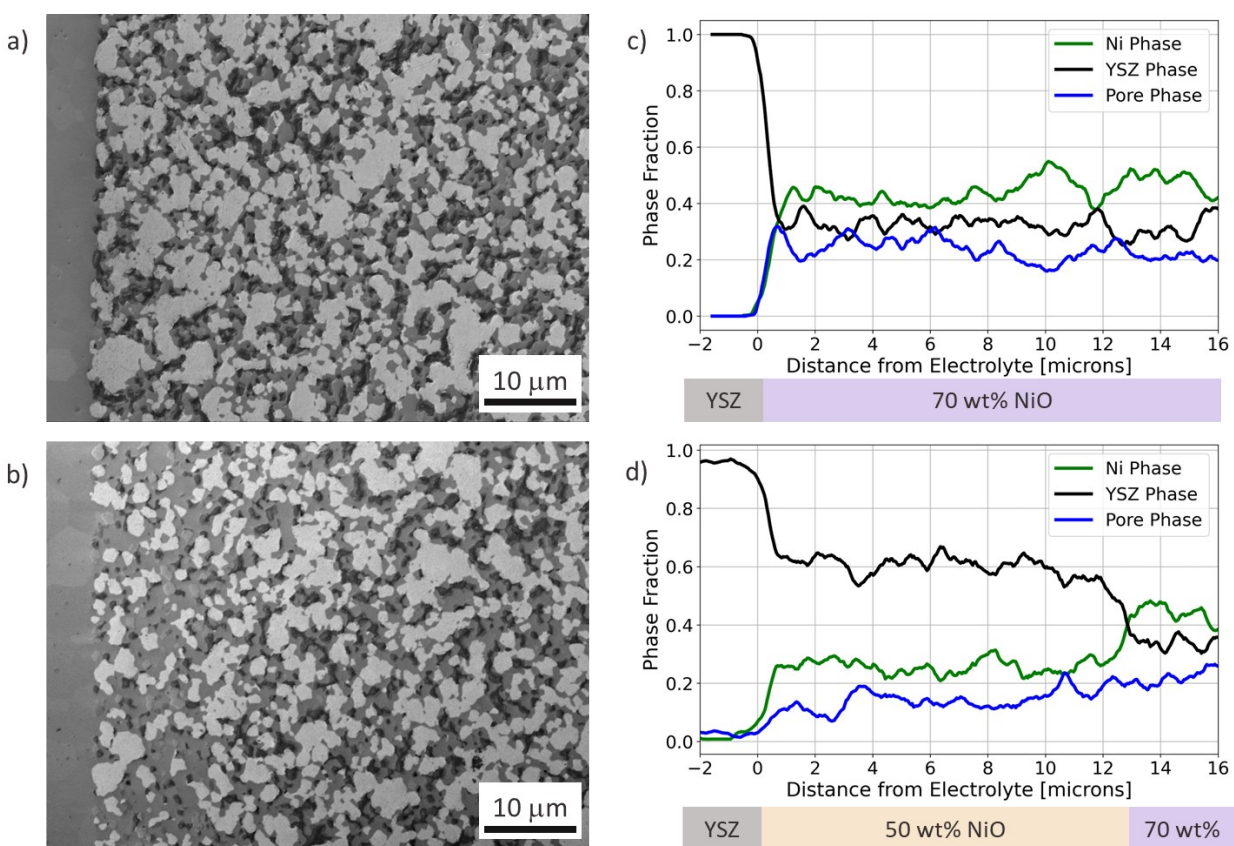

**Figure S1** Cross sectional SEM images of pristine SOEC electrodes as reduced 100 hours before cell operation of (a) 70|70 and (b) and 70|50/70 cell. Ni has a lighter grey contrast, pores are black, and YSZ is a darker grey. Also shown are phase fractions versus distance taken from 2D image analysis for the 70|70 (c) and 70|50/70 (d) cells.

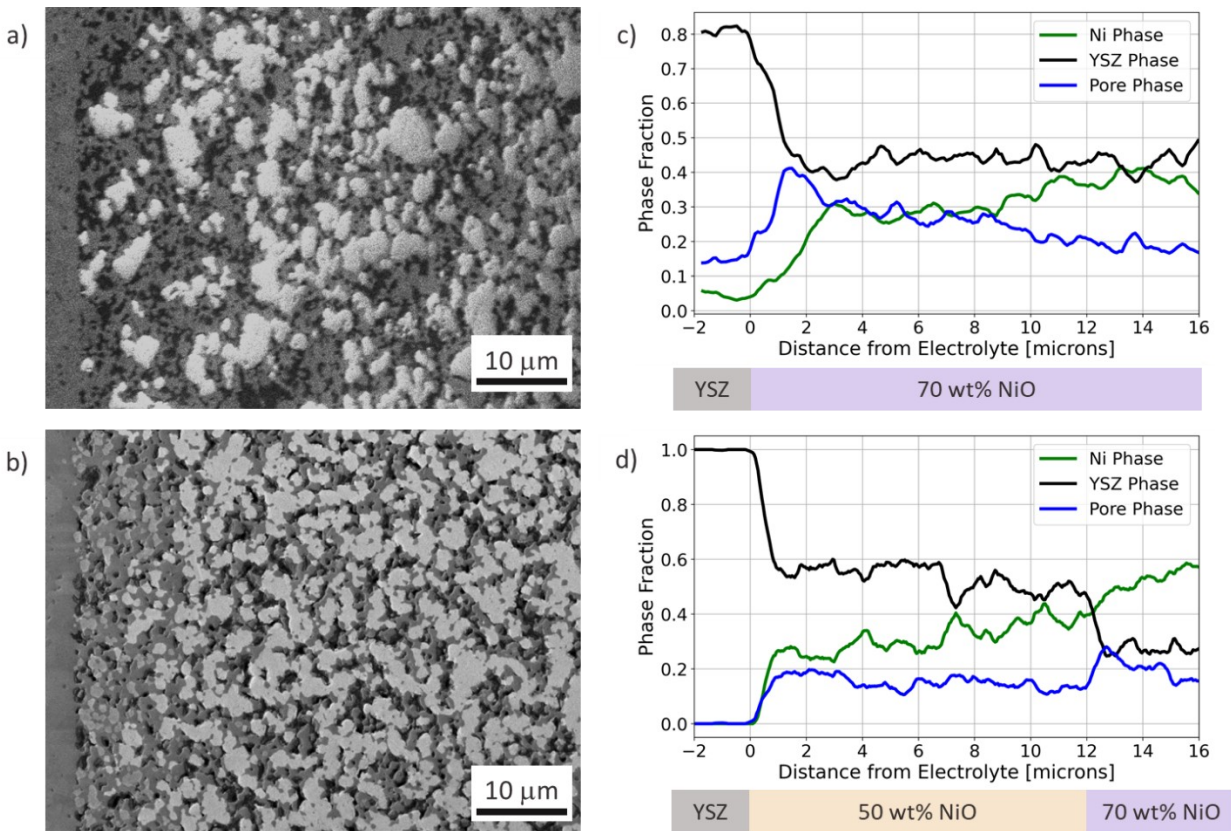

**Figure S2** Cross sectional SEM images showing another sample of 70|70 (a) and 70|50/70 (b) cells after 500 h life testing at  $-1 \text{ A/cm}^2$  current density at  $800^\circ\text{C}$  in  $85\% \text{ H}_2\text{O} - 15\% \text{ H}_2$ . Ni has a lighter grey contrast, pores are black, and YSZ is a darker grey. Also shown are phase fractions versus distance taken from 2D image analysis for the 70|70 (c) and 70|50/70 (d) cells.

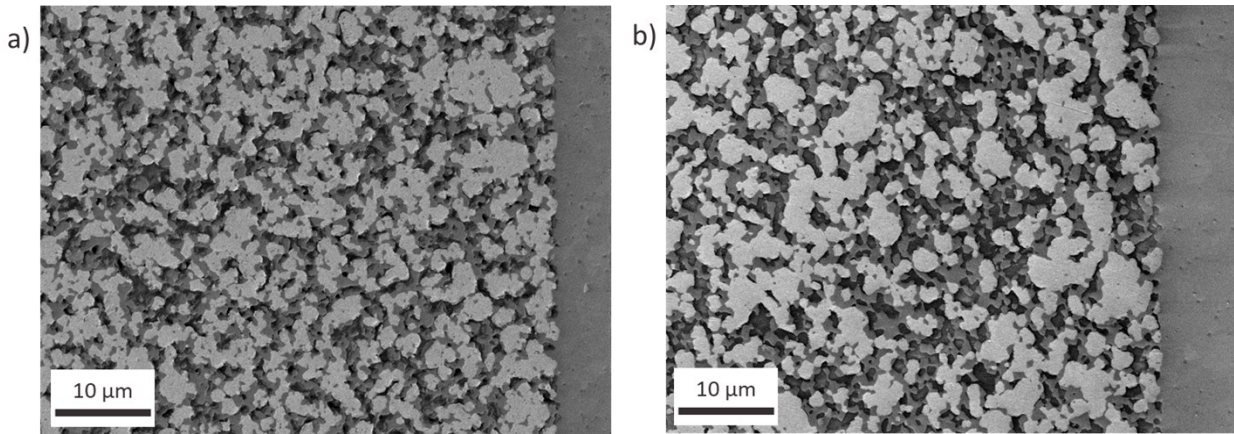

**Figure S3** Cross sectional SEM images of SOFC electrodes after 500 h life testing at  $-1 \text{ A/cm}^2$  current density at  $800^\circ\text{C}$  in  $85\% \text{ H}_2\text{O} - 15\% \text{ H}_2$  from (a) 70|70 and (b) and 70|50/70 cell.

Total Resistance = Inductance + Electrolyte Ionic + High Frequency + Transmission Line + Warburg

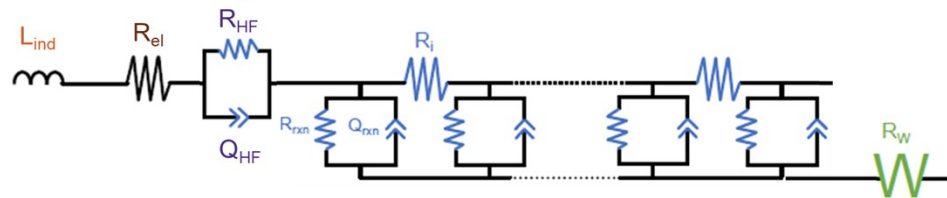

**Figure S4** Equivalent circuit model that includes in series an inductance ( $L_{ind}$ ) associated with test setup wiring, an electrolyte ionic resistance ( $R_{el}$ ), a high frequency response (HF), a transmission line model element (TLM), and a Warburg gas diffusion element ( $R_w$ ).

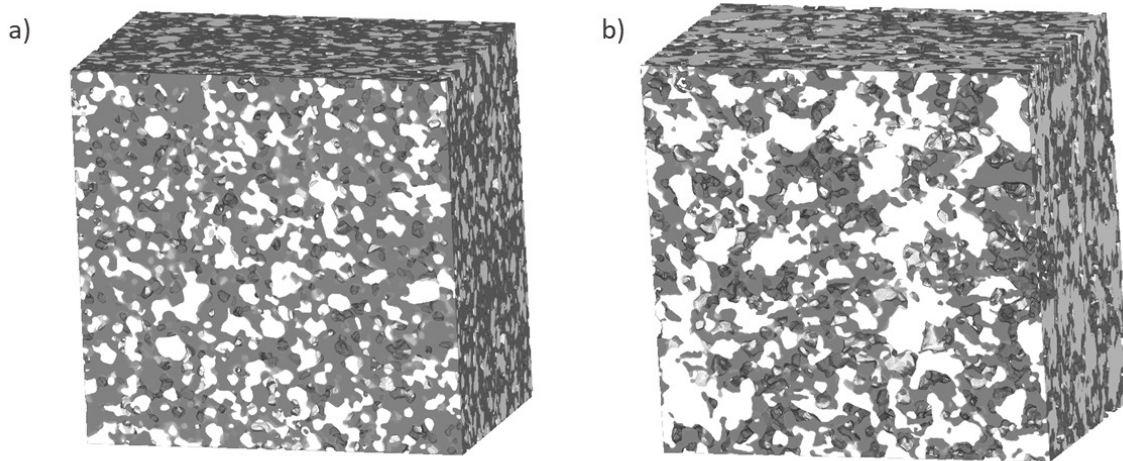

**Figure S5** 3D microstructure reconstruction of (a) 50 wt% NiO and (b) 70 wt% NiO characterized on Plasma FIB-SEM with size  $27 \times 28 \times 27 \mu\text{m}^3$ . The white, grey and black phases represent nickel, YSZ, and pore, respectively.

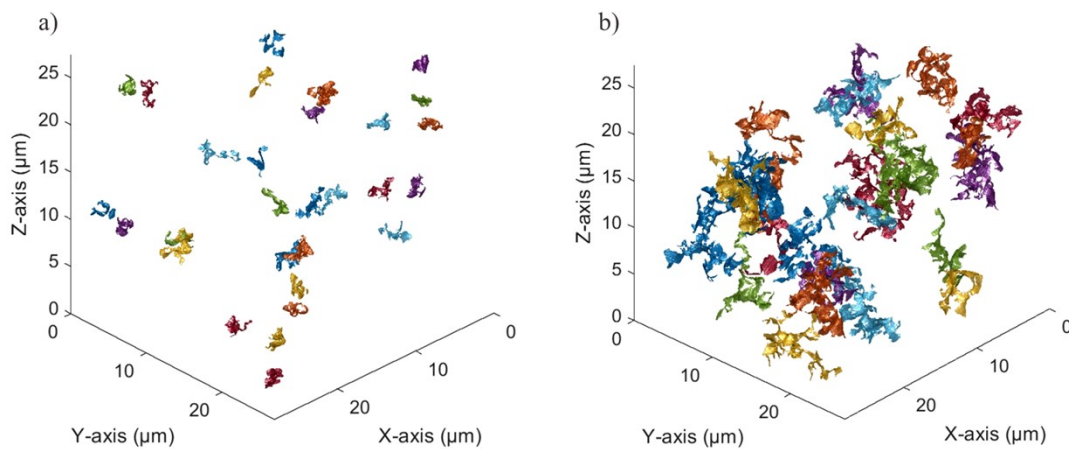

**Figure S6** 3D volume of Ni-pore interfaces of (a) 50 wt% NiO and (b) 70 wt% NiO electrodes. Only the 30 largest interfaces are shown for clarity, and the different colors indicate different isolated Ni-pore interfaces.

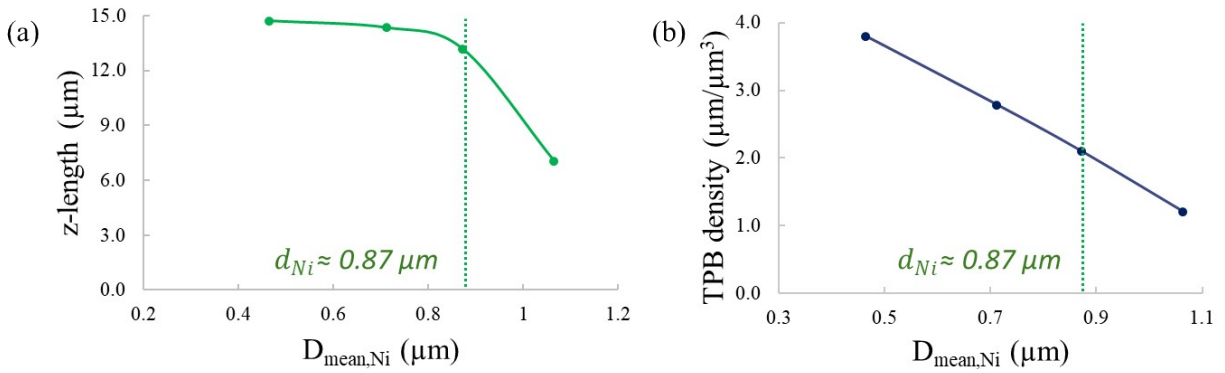

**Figure S7** Evolution of the average z-length of Ni-Pore interfaces (a) and TPB lengths density (b) as a function of the Ni mean diameter ( $d_{\text{Ni}}$ ). Microstructural properties were calculated on 3D artificial microstructures ( $15 \mu\text{m}^3$  cubes) generated with Ni = 37.5 vol%, YSZ = 37.5 vol%, porosity = 25 vol%, and  $d_{\text{YSZ}} = 0.68 \mu\text{m}$ .

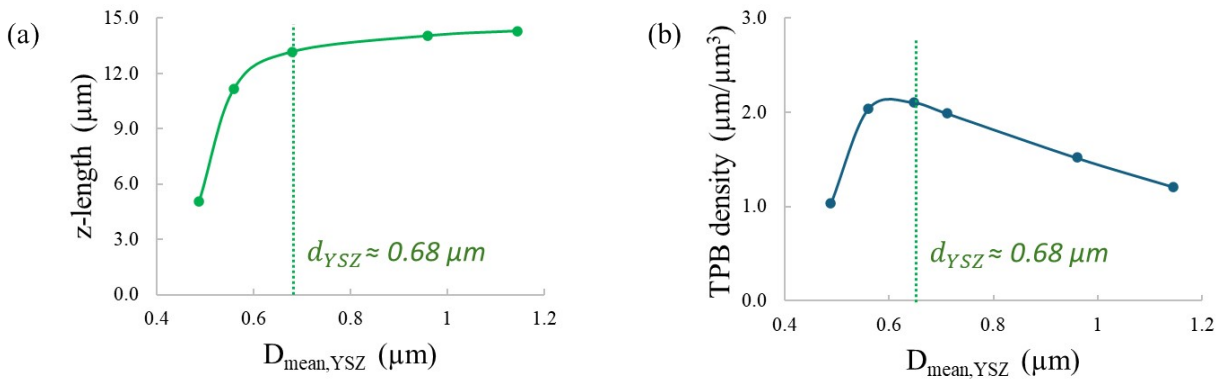

**Figure S8** Evolution of the average z-length of Ni-Pore interfaces (a) and TPB lengths density (b) as a function of the YSZ mean diameter ( $d_{\text{YSZ}}$ ). Microstructural properties were calculated on 3D artificial microstructures ( $15 \mu\text{m}^3$  cubes) generated with Ni = 37.5 vol%, YSZ = 37.5 vol%, porosity = 25 vol%, and  $d_{\text{Ni}} = 0.87 \mu\text{m}$ .

## Supplementary Table

**Table S1** Microstructural properties of the 3D artificial microstructures

| NiO:YSZ     | 45:55 | 50:50 | 55:45 | 60:40 | 65:35 | 70:30 | 75:25 | [%wt]                  |
|-------------|-------|-------|-------|-------|-------|-------|-------|------------------------|
| Pore        | 16.5  | 20.1  | 21.8  | 23.1  | 27.0  | 28.6  | 30.8  | [%vol]                 |
| YSZ         | 58.1  | 52.4  | 47.6  | 43.1  | 37.2  | 32.8  | 27.5  | [%vol]                 |
| Ni          | 25.3  | 27.5  | 30.6  | 33.8  | 35.8  | 38.6  | 41.7  | [%vol]                 |
| $d_{pore}$  | 0.45  | 0.50  | 0.52  | 0.57  | 0.64  | 0.68  | 0.72  | [ $\mu\text{m}$ ]      |
| $d_{YSZ}$   | 0.74  | 0.74  | 0.70  | 0.71  | 0.70  | 0.69  | 0.68  | [ $\mu\text{m}$ ]      |
| $d_{Ni}$    | 0.74  | 0.79  | 0.83  | 0.89  | 0.96  | 1.00  | 1.06  | [ $\mu\text{m}$ ]      |
| TPB density | 1.65  | 1.88  | 1.88  | 1.92  | 1.78  | 1.73  | 1.64  | [ $\mu\text{m}^{-2}$ ] |
| z-length    | 1.7   | 3.0   | 4.4   | 9.1   | 13.4  | 14.0  | 14.6  | [ $\mu\text{m}$ ]      |

**Table S2** Ni-Pore interface size distribution for Ni-YSZ electrodes with different initial NiO wt%

| Ni-Pore Interface Size [ $\mu\text{m}$ ] |       |       |
|------------------------------------------|-------|-------|
| NiO-YSZ                                  | 50-50 | 70-30 |
| <1                                       | 18416 | 9478  |
| 1 to 2                                   | 1819  | 1562  |
| 2 to 3                                   | 132   | 402   |
| 3 to 4                                   | 8     | 133   |
| 4 to 5                                   | 0     | 43    |
| $\geq 5$                                 | 0     | 41    |
